# Supplementary material
Source: PubMed Central journal article supplement (PMC4597780)

# Supplemental Figure 1. Heat maps of RNA-seq analysis

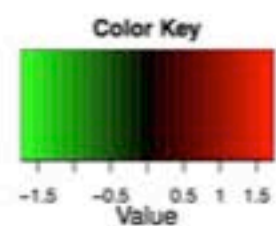

A.

## Oxidative Phosphorylation

V.C./Untr.

V.C./EtOH

4NQO/Untr.

4-NQO/EtOH

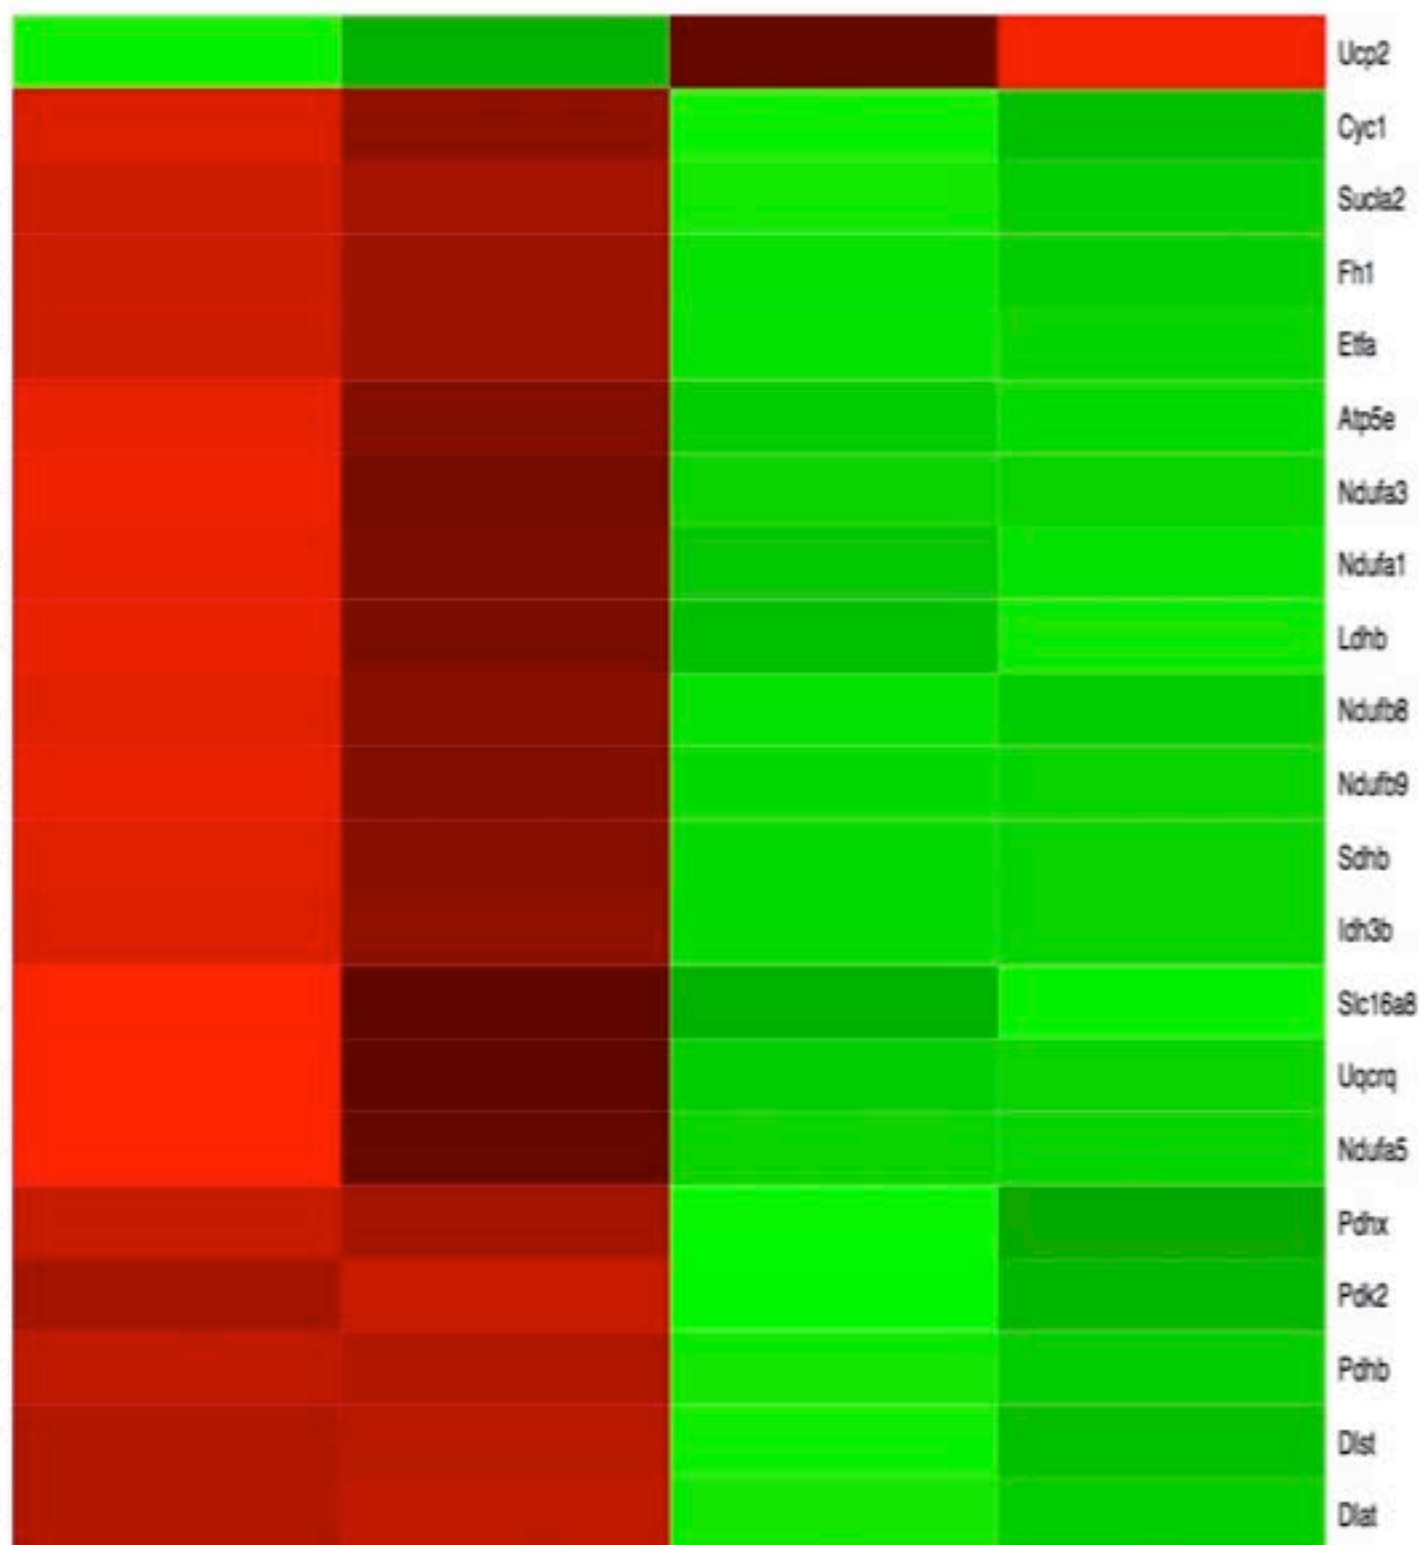

# Supplemental Figure 1. Heat maps of RNA-seq analysis

B.

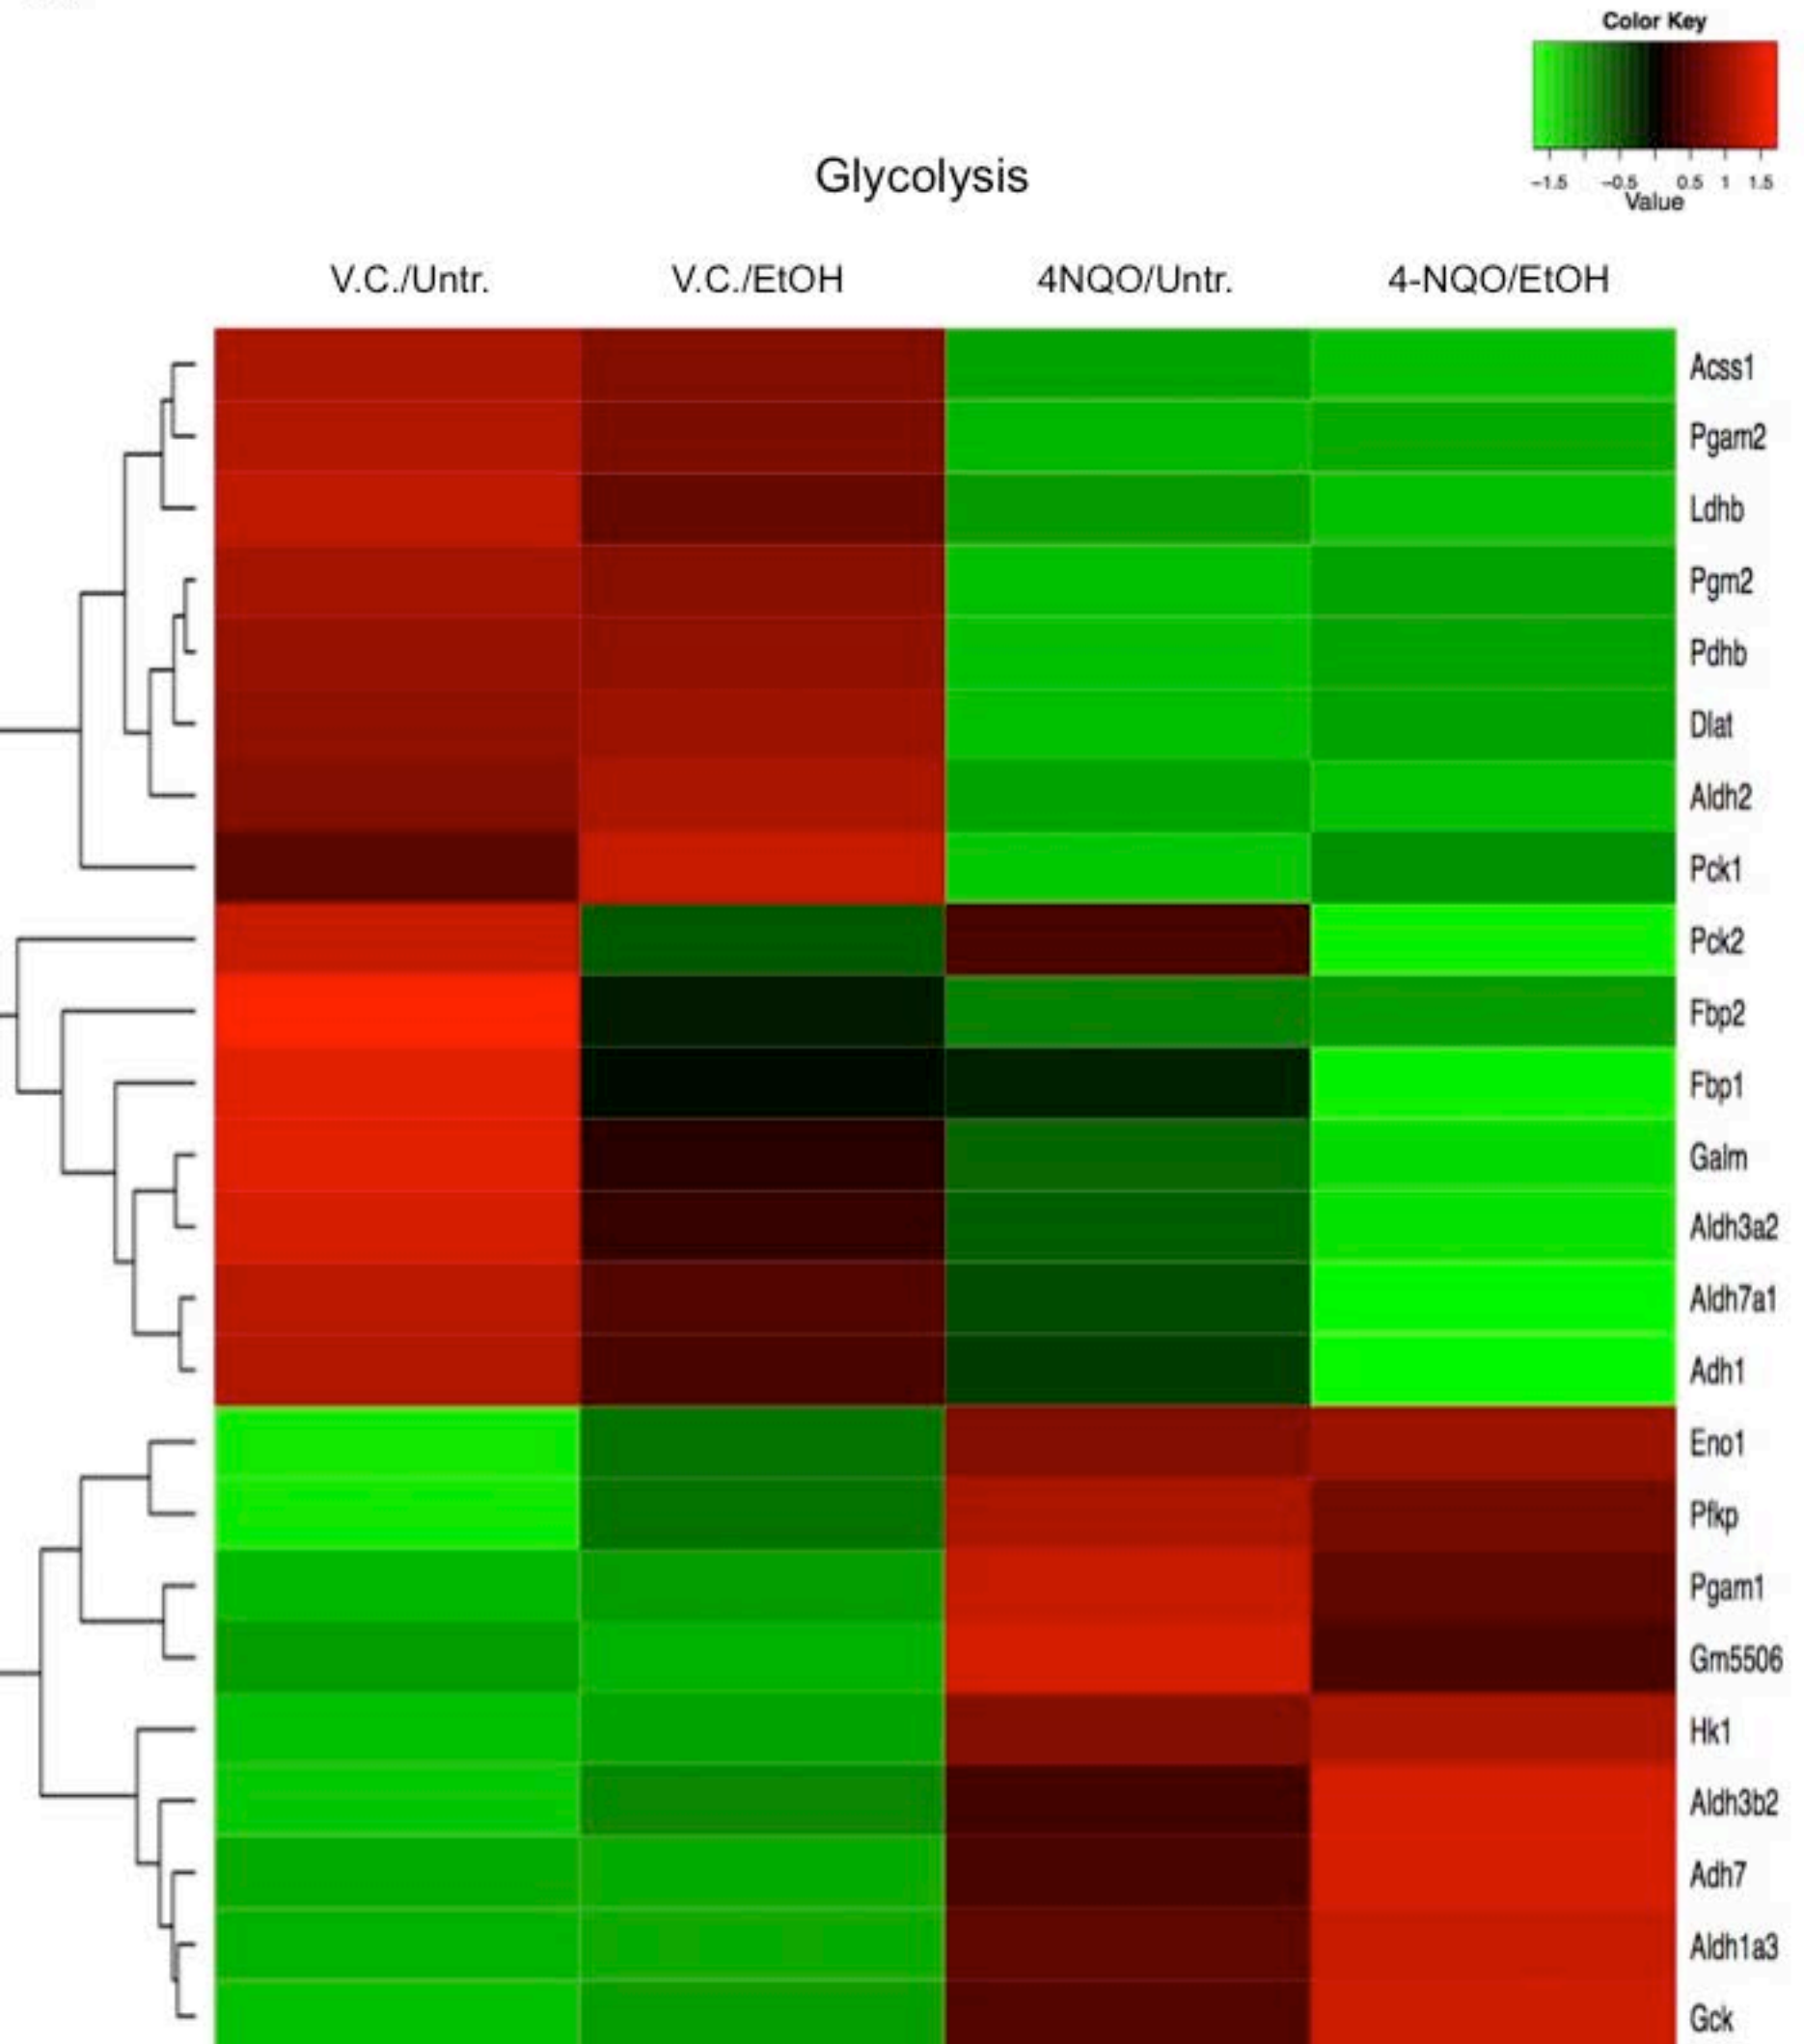

# Supplemental Figure 2. RNA-seq analysis of alcohol metabolism genes

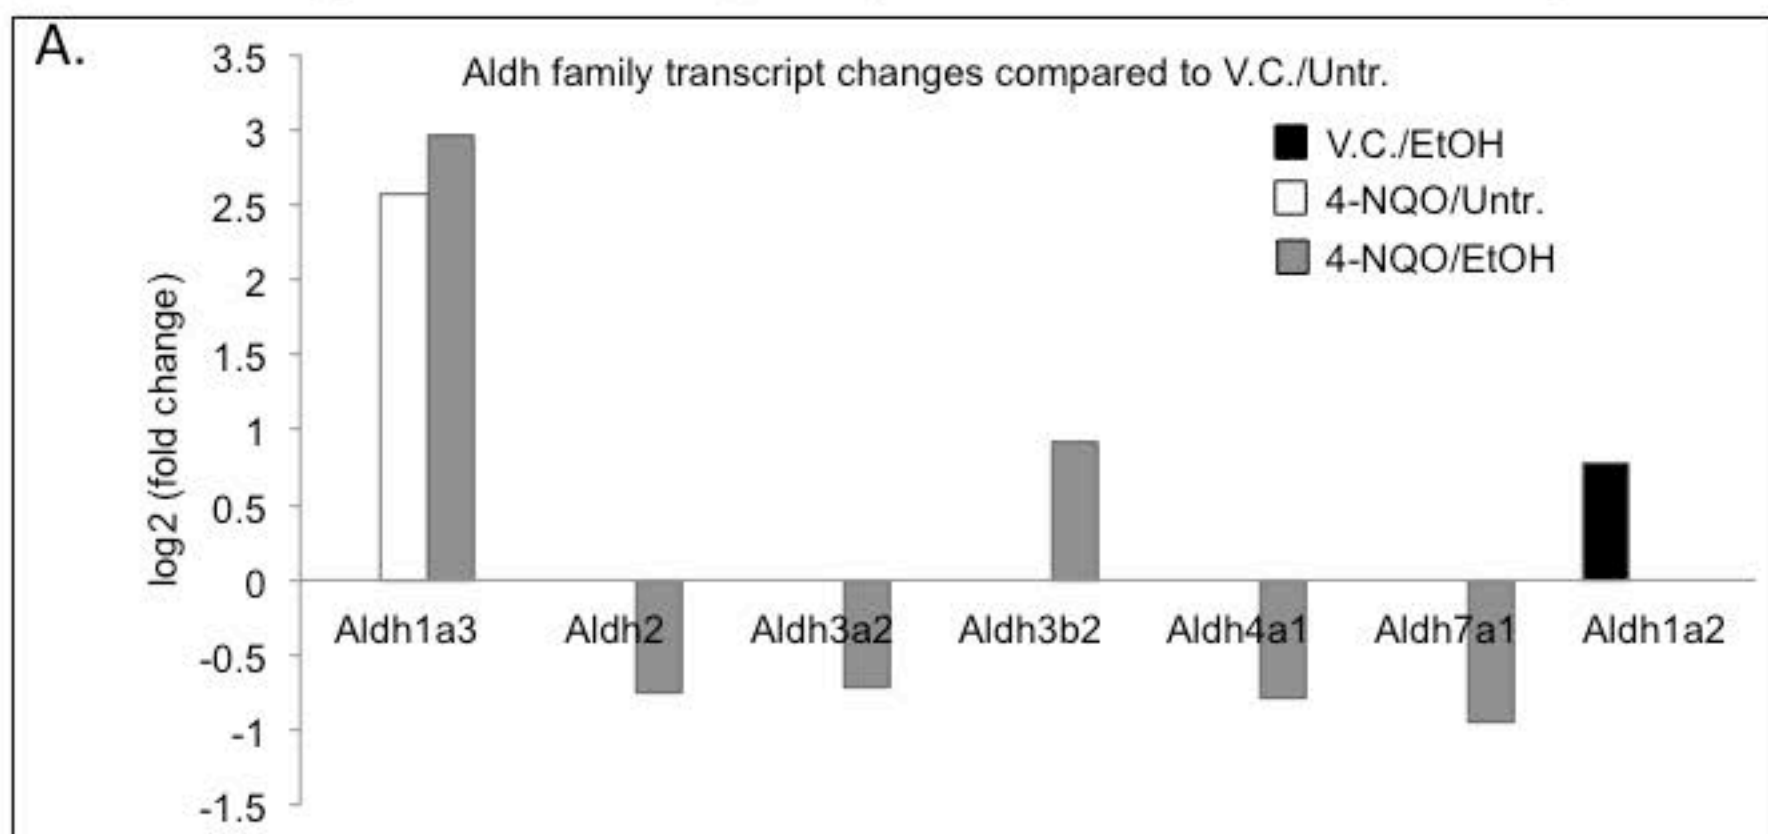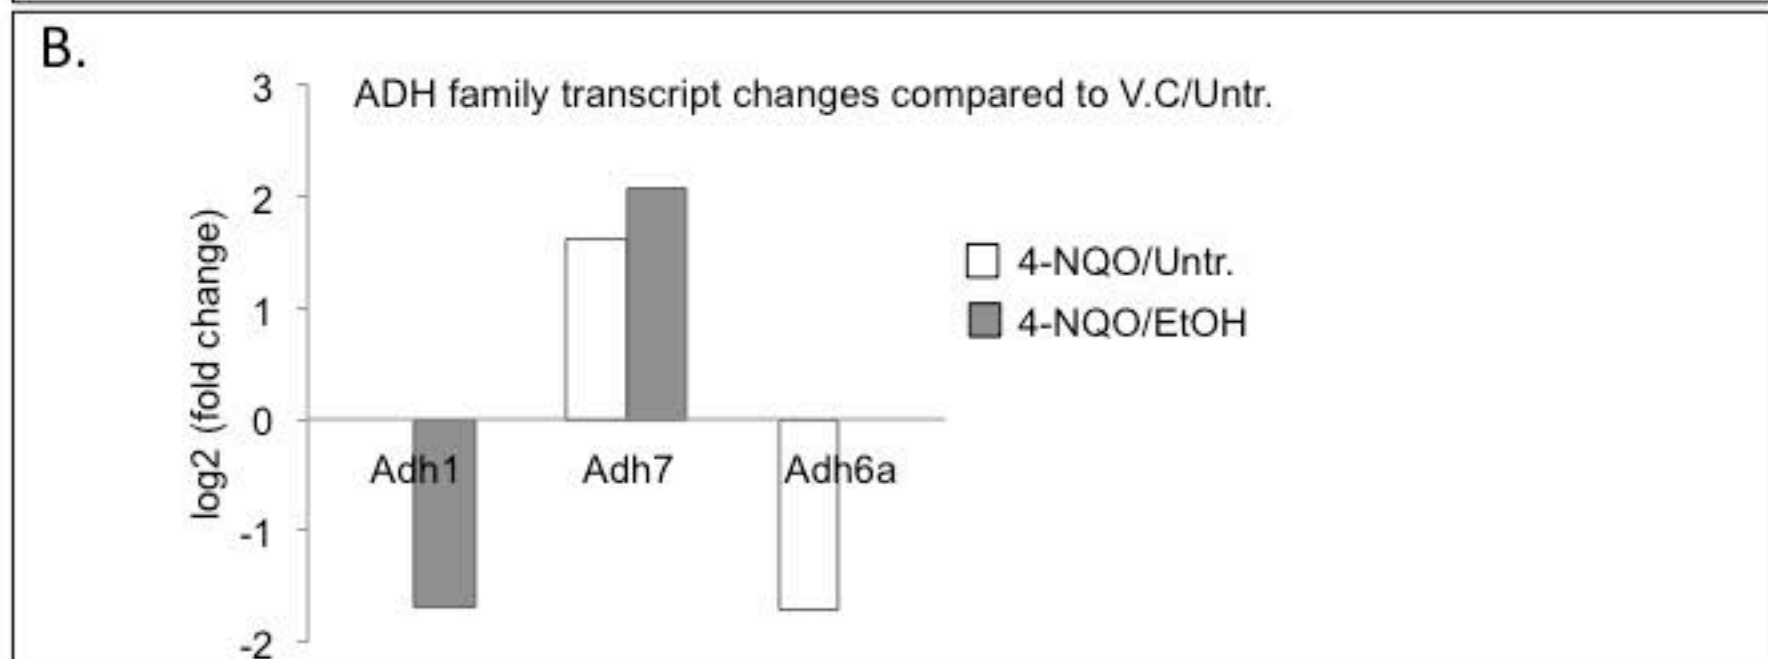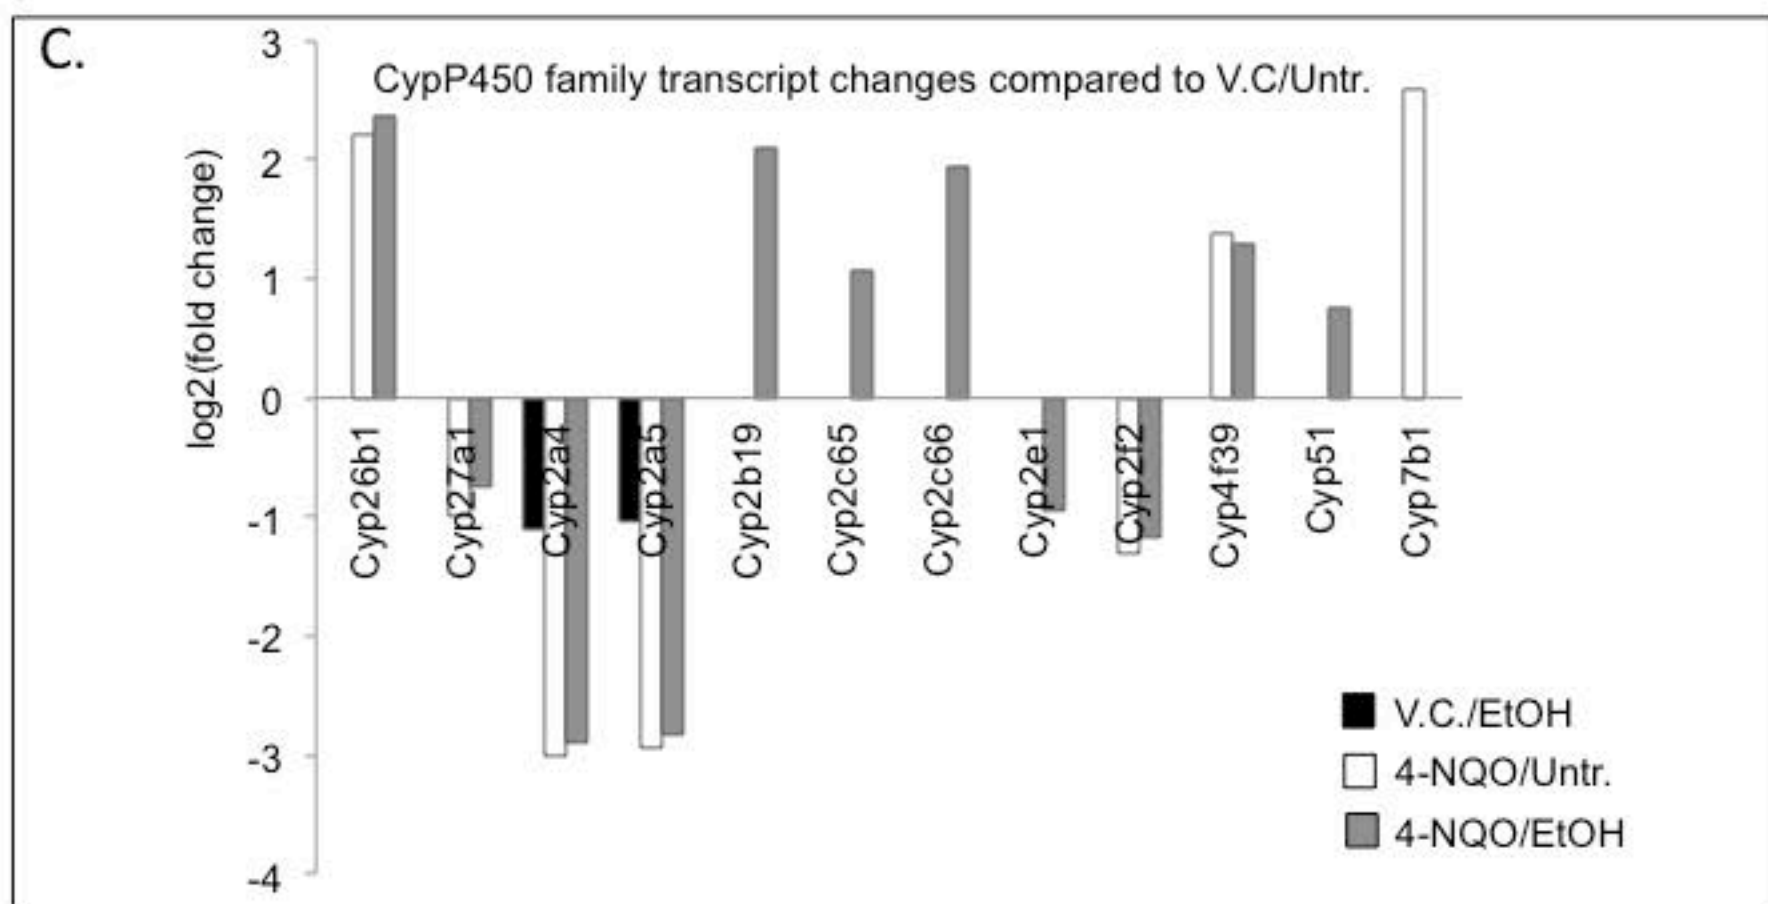

Supplemental Figure 3. Blood Alcohol Content

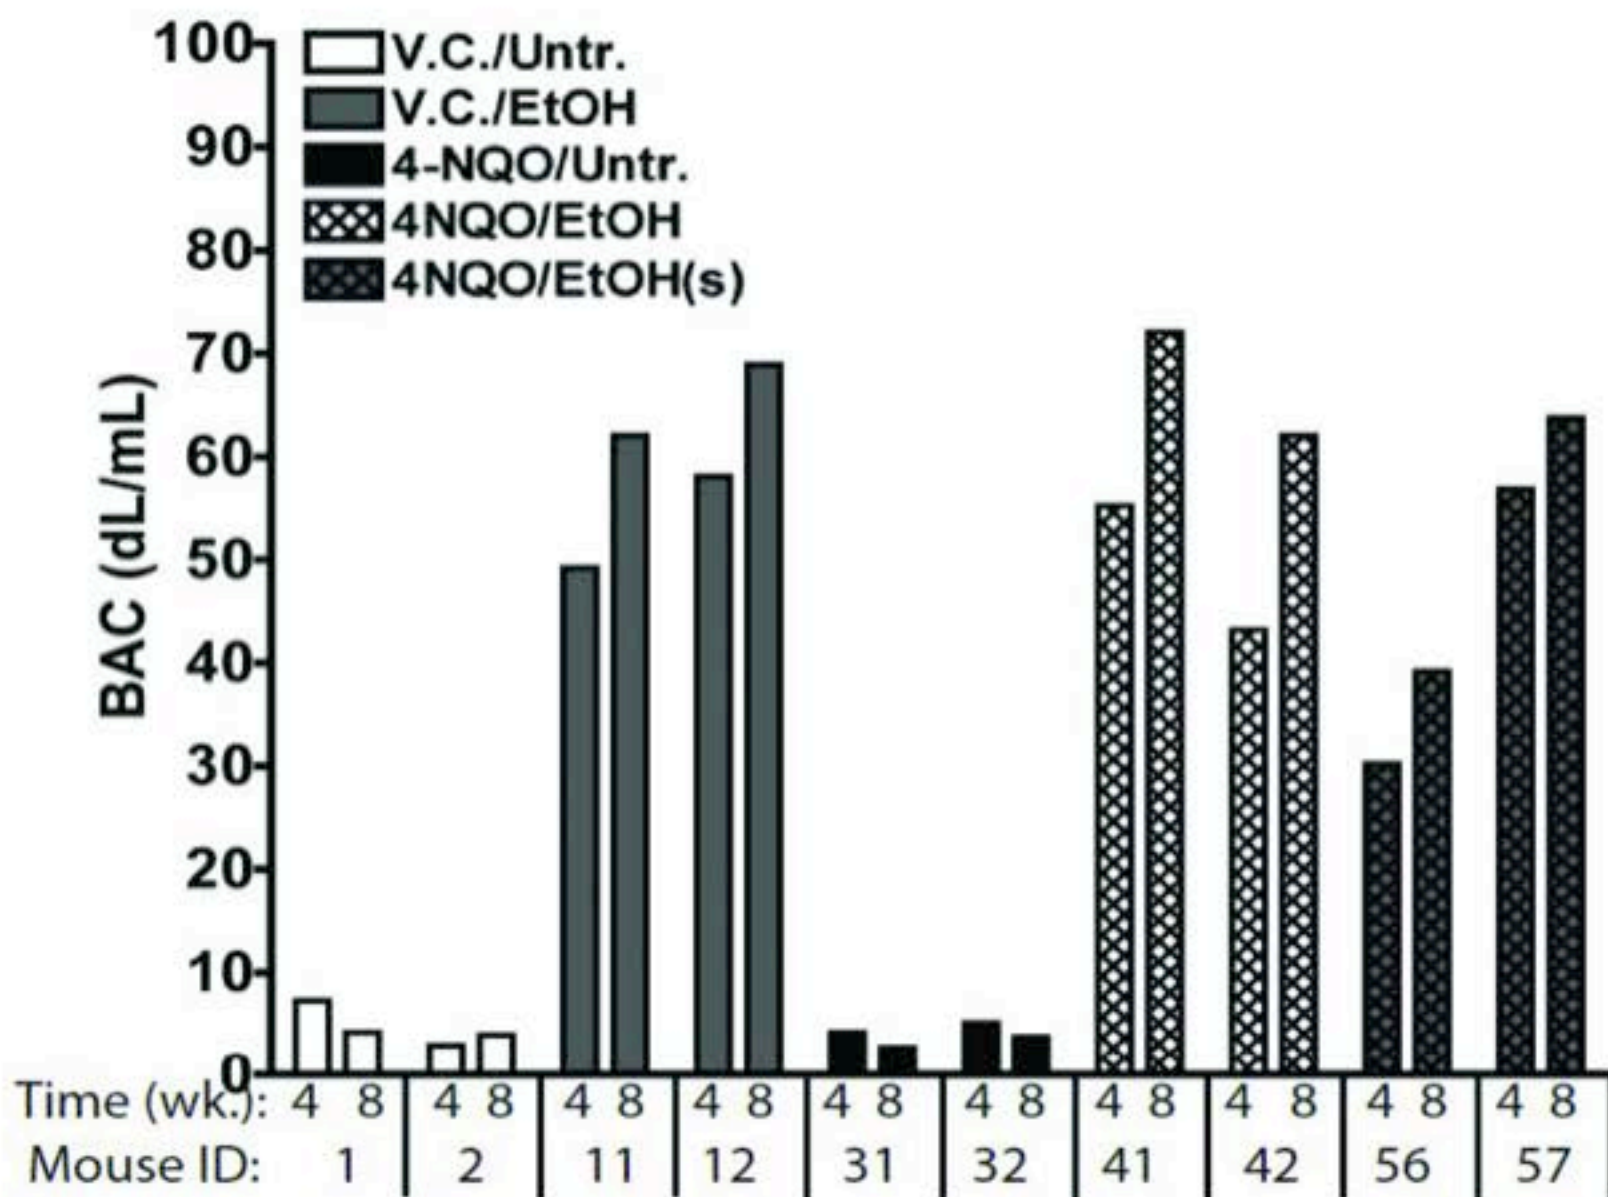

Supplemental Figure 4. EZH2 protein expression is increased after carcinogen exposure.

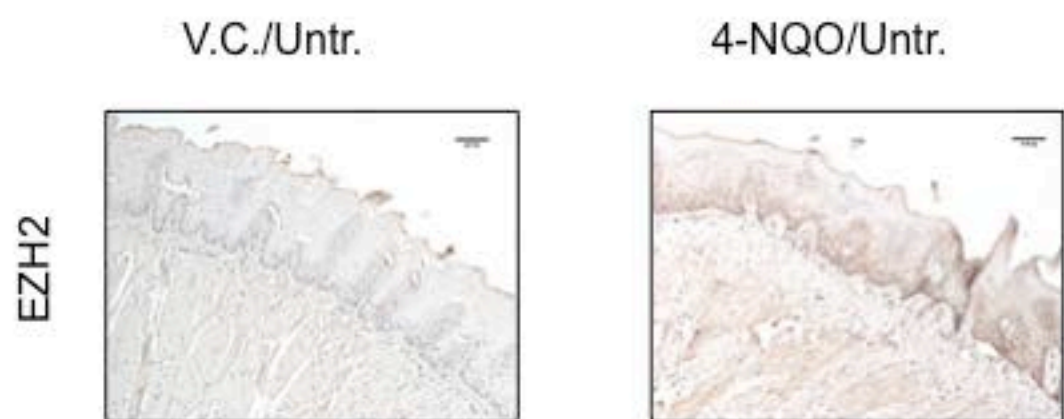

Supplement: NIHMS690147-supplement-Supp_FigureS1-S4.pdf [file NIHMS690147-supplement-Supp_FigureS1-S4.pdf]
